# Supplementary material for: Plasmodium simium, a Plasmodium vivax-Related Malaria Parasite: Genetic Variability of Duffy Binding Protein II and the Duffy Antigen/Receptor for Chemokines
Source: PubMed Central journal article supplement (PMC4480967; doi:10.1371/journal.pone.0131339), 2015-06-24
Supplement: pone.0131339.s001.pdf [file pone.0131339.s001.pdf]

|                | 10                                                                                                                                                 | 20 | 30 | 40 | 50 | 60 | 70 | 80 | 90 | 100 | 110 | 120 | 130 | 140 | 150 |
|----------------|----------------------------------------------------------------------------------------------------------------------------------------------------|----|----|----|----|----|----|----|----|-----|-----|-----|-----|-----|-----|
| H1_AC141       | AACAAAGACTTTTCAAGGATATAAGATGGAGTTGGGAGATTTGGAGATATAATTATGGGAACGGATATGGAAGGCATCGGATATTCCAAAGTAGTGGAAAAATAATTCGCCAGCATCTTTGGAAGTGGTGAAGAGGCCAACAGCAT |    |    |    |    |    |    |    |    |     |     |     |     |     |     |
| H2_DBPIndia03  | N K D F C K D I R W S L G D F G D I I M G T D M E G I G Y S K V V E N N L R S I F G T G E K A Q Q H<br>A                                           |    |    |    |    |    |    |    |    |     |     |     |     |     |     |
| H3_THAI17      | N K D F C K D I R W S L G D F G D I I M G T D M E G I G Y S K V V E N N L R S I F G T D E K A Q Q R<br>G T A T                                     |    |    |    |    |    |    |    |    |     |     |     |     |     |     |
| H4_RO13970     | N K D F C K D I R W S L G D F G D I I M G T D M E G I G Y S K V V E D N L R S I F G T G K N A Q Q H<br>T                                           |    |    |    |    |    |    |    |    |     |     |     |     |     |     |
| H5_IranX       | N K D F C K D I R W S L G D F G D I I M G T D M E G I G Y S K V V E N N L R S I F G T D E K A Q Q R<br>A                                           |    |    |    |    |    |    |    |    |     |     |     |     |     |     |
| H6_SLKCPV4576  | N K D F C K D I R W S L G D F G D I I M G T D M E G I G Y S K V V E N N L R S I F G T D E K A Q Q R<br>G A T                                       |    |    |    |    |    |    |    |    |     |     |     |     |     |     |
| H8_IndiaCH51   | N K D F C K D I R W S L G D F G D I I M G T D M E G I G Y S E V V E N N L R S I F G T G K N A Q Q R<br>G                                           |    |    |    |    |    |    |    |    |     |     |     |     |     |     |
| H9_PA53        | N K D F C K D I R W S L G D F G D I I M G T D M E G I G Y S K V V E N N L R S I F G T G E K A Q Q H                                                |    |    |    |    |    |    |    |    |     |     |     |     |     |     |
| H11_SLKASA182  | N K D F C K D I R W S L G D F G D I I M G T D M E G I G Y S K V V E N N L R S I F G T G E K A Q Q H<br>G                                           |    |    |    |    |    |    |    |    |     |     |     |     |     |     |
| H12_SLKKTpv058 | N K D F C K D I R W S L G D F G D I I M G T D M E G I G Y S E V V E N N L R S I F G T G E K A Q Q R<br>T A T                                       |    |    |    |    |    |    |    |    |     |     |     |     |     |     |
| H13_SLKAP253   | N K D F C K D I R W S L G D F G D I I M G T D M E G I G Y S K V V E N N L R S I F G T G K N A Q Q H<br>T A T                                       |    |    |    |    |    |    |    |    |     |     |     |     |     |     |
| H19_PNG7mHap1  | N K D F C K D I R W S L G D F G D I I M G T D M E G I G Y S K V V E N N L R S I F G T G E K A Q Q R<br>C                                           |    |    |    |    |    |    |    |    |     |     |     |     |     |     |
| H21_SLKKTpv029 | N K D F C K D I R W S L G D F G D I I M G T D M E G I G Y S K V V E N N L R S I F G T G E Q A Q Q R<br>G                                           |    |    |    |    |    |    |    |    |     |     |     |     |     |     |
| H41_KOR97-13   | N K D F C K D I R W S L G D F G D I I M G T D M E G I G Y S E V V E N N L R S I F G T G E K A Q Q R<br>G                                           |    |    |    |    |    |    |    |    |     |     |     |     |     |     |
| H46_PNGw152    | N K D F C K D I R W S L G D F G D I I M G T D M E G I G Y S K V V E N N L R S I F G T G E K A Q Q H                                                |    |    |    |    |    |    |    |    |     |     |     |     |     |     |
| H47_PNGw168    | N K D F C K D I R W S L G D F G D I I M G T D M E G I G Y S K V V E N N L R S I F G T G E K A Q Q H                                                |    |    |    |    |    |    |    |    |     |     |     |     |     |     |
| H60_SLKASA185  | N K D F C K D I R W S L G D F G D I I M G T D M E G I G Y S K V V E N N L R S I F G T G E K A Q Q H                                                |    |    |    |    |    |    |    |    |     |     |     |     |     |     |
| H62_SLKKTpv022 | N K D F C K D I R W S L G D F G D I I M G T D M E G I G Y S E V V E N N L R S I F G T G K N A Q Q H<br>G A T                                       |    |    |    |    |    |    |    |    |     |     |     |     |     |     |
| H75_THAI65     | N K D F C K D I R W S L G D F G D I I M G T D M E G I G Y S E V V E N N L R S I F G T G E Q A Q Q R<br>G C                                         |    |    |    |    |    |    |    |    |     |     |     |     |     |     |
| BL03_DBP       | N K D F C K D I R W S L G D F G D I I M G T D M E G I G Y S K V V E N N L R S I F G T G I N A Q Q H<br>T A T                                       |    |    |    |    |    |    |    |    |     |     |     |     |     |     |
| BL04_DBP       | N K D F C K D I R W S L G D F G D I I M G T D M E G I G Y S N V V E N N L R S I F G T G Q N A Q Q H<br>T C T                                       |    |    |    |    |    |    |    |    |     |     |     |     |     |     |
| BL05_DBP       | N K D F C K D I R W S L G D F G D I I M G T D M E G I G Y S N V V E N N L R S I F G T G Q N A Q Q H<br>T C T                                       |    |    |    |    |    |    |    |    |     |     |     |     |     |     |
| BL06_DBP       | N K D F C K D I R W S L G D F G D I I M G T D M E G I G Y S K V V E N N L R S I F G T G Q N A Q Q H<br>T A T                                       |    |    |    |    |    |    |    |    |     |     |     |     |     |     |
| BL10_DBP       | N K D F C K D I R W S L G D F G D I I M G T D M E G I G Y S K V V E N N L R S I F G T G K N A Q Q H<br>T A T                                       |    |    |    |    |    |    |    |    |     |     |     |     |     |     |
| BL61_DBP       | N K D F C K D I R W S L G D F G D I I M G T D M E G I G Y S K V V E N N L R S I F G T G I N A Q Q H<br>T C T                                       |    |    |    |    |    |    |    |    |     |     |     |     |     |     |
| BL64_DBP       | N K D F C K D I R W S L G D F G D I I M G T D M E G I G Y S N V V E N N L R S I F G T G Q N A Q Q H<br>T C T                                       |    |    |    |    |    |    |    |    |     |     |     |     |     |     |
|                |                                                                                                                                                    |    |    |    |    |    |    |    |    | ▲▲  | ▲   | ▲   | ▲▲  | ▲   | ▲   |
