# Supplementary material for: Plasmodium simium, a Plasmodium vivax-Related Malaria Parasite: Genetic Variability of Duffy Binding Protein II and the Duffy Antigen/Receptor for Chemokines
Source: PubMed Central journal article supplement (PMC4480967; doi:10.1371/journal.pone.0131339), 2015-06-24
Supplement: pone.0131339.s002.pdf [file pone.0131339.s002.pdf]

*Cercopithecus mitis* L A Q L A V G S A L F S I V V P I L A P G L G S T R S P A L C S L G Y C V W Y G S A F A Q A L L L G  
*Cercopithecus mona* L A Q L A V G S A L F S I V V P I L A P G L G S T R S S A L C S L G Y C V W Y G S A F A Q A L L L G  
*Cercopithecus wolfi* L A Q L A V G S A L F S I V V P I L A P G L G S T R S S A L C S L G Y C V W Y G S A F A Q A L L L G  
*Trachypithecus francoisi* L A Q L A V G S A L F S I V V P I L A P G L G S T R S S A L C S L G Y C V W Y G S A F A Q A L L L G  
*Colobus guereza* L A Q L A V G S A L F S I V V P I L A P G L G S T R S S A L C S L G Y C V W Y G S A F A Q A L L L G  
*Rhinopithecus roxellana* L A Q L A V G S A L F S I V V P I L A P G L G S T R S S A L C S L G Y C V W Y G S A F A Q A L L L G  
*Pan paniscus* L A Q L A V G S A L F S I V V P I L A P G L G S T R S S A L C S L G Y C V W Y G S A F A Q A L L L G  
*Pan troglodytes* L A Q L A V G S A L F S I V V P I L A P G L G S T R S S A L C S L G Y C V W Y G S A F A Q A L L L G  
*Homo sapiens* L A Q L A V G S A L F S I V V P I L A P G L G S T R S S A L C S L G Y C V W Y G S A F A Q A L L L G  
*Gorilla gorilla* L A Q L A V G S A L F S I V V P I L A P G L G S T R S S A L C S L G Y C V W Y G S A F A Q A L L L G  
*Pongo abelii* L A Q L A V G S A L F S I V V P I L A P G L G S T R S S A L C S L G Y C V W Y G S A F A Q A L L L G  
*Pongo pygmaeus* L A Q L A V G S A L F S I V V P I L A P G L G S T R S S A L C S L G Y C V W Y G S A F A Q A L L L G  
*Hylobates agilis* L A Q L A V G S A L F S I V V P I L A P G L G S T R S S A L C S L G Y C V W Y G S A F A Q A L L L G  
*Hylobates pileatus* L A Q L A V G S A L F S I V V P I L A P G L G S T R S S A L C S L G Y C V W Y G S A F A Q A L L L G  
*Hylobates lar* L A Q L A V G S A L F S I V V P I L A P G L G S T R S S A L C S L G Y C V W Y G S A F A Q A L L L G  
*Symphalangus syndactylus* L A Q L A V G S A L F S I V V P I L A P G L G S T R S S A L C S L G Y C V W Y G S A F A Q A L L L G  
*Nomascus gabrielle* L A Q L A V G S A L F S I V V P I L A P G L G S T R S S A L C S L G Y C V W Y G S A F A Q A L L L G  
*Nomascus leucogenys* L A Q L A V G S A L F S I V V P I L A P G L G S T R S S A L C S L G Y C V W Y G S A F A Q A L L L G  
*Chiropotes satanas* L A Q L A V G S A L F S I V V P I L A P G L G S T R S S A L C S L G Y C V W Y G S A F A Q A L L L G  
*Pithecia pithecia* L A Q L A V G S A L F S I V V P I L A P G L G N T R S S T L C S L G Y C V W Y G S A F A Q A L L L G  
*Callicebus cupreus* L A Q L A V G S A L F S I V V P I L A P G L G N T R S S A L C S L G Y C V W Y G S A F A Q A L L L G  
*Alouatta clamitans* L A Q L A V G S A L F S I V V P I L A P G L G N T R S S A L C S L G Y C V W Y G S A F A Q A L L L G  
*Ateles geoffroyi* L A Q L A V G S A L F S I V V P I L A P G L G N T R S S A L C S L G Y C V W Y G S A F A Q A L L L G  
*Callithrix sp.* L A Q L A V G S A L F S I V V P I L A P G L G N T R S S A L C S L G Y C V W Y G S A F A Q A L L L G  
*Callithrix jacchus* L A Q L A V G S A L F S I V V P I L A P G L G N T R S S A L C S L G Y C V W Y G S A F A Q A L L L G  
*Saguinus imperator* L A Q L A V G S T L F S I V V P I L A P G L G N T R S S A P C S L G Y C V W Y G S A F A Q A L L L G  
*Saguinus midas* L A Q L A V G S T L F S I V V P I L A P G L G N T R S S A L C S L G Y C V W Y G S A F A Q A L L L G  
*Aotinae* L A Q L A V G S A L F S I V V P I L A P G L G N T R S S A L C S L G Y C V W Y G S A F A Q A L L L G  
*Cebus apella* L A Q L A V G S A L F S I V V P I L A P G L G N T R S S A L C S L G Y C V W Y G S A F A Q A L L L G  
*Saimiri boliviensis* L A Q L A V G S A L F S I V V P I L A P G L G N T H S S A L C S L G Y C V W Y G S A F A Q A L L L G  
*Saimiri sciureus* L A Q L A V G S A L F S I V V P I L A P G L G N T H S S A L C S L G Y C V W Y G S A F A Q A L L L G  
*Saimiri ustus* L A Q L A V G S A L F S I V V P I L A P G L G N T H S S A L C S L G Y C V W Y G S A F A Q A L L L G  
  
*Macaca mulatta* T G C C A T G C C T C C C T G G G C C C C A A A C T G G G T G C A G G C C A G G T C C C A G G C C T C A C C C T G G G G C T C T C T G T G G C C T T T G G G A G T G G C G G C C T A C T G A C A C T G C C T A T C A C C T T G G C A G T G G C C T T C T G G T G G A C T C T G C A C T C G G C A  
*Macaca thibetana* C H A S L G P K L G A G Q V P G L T L G L S V G L W G V A A L L T L P I T L A S G A S G G L C T P A  
*Cercocebus torquatus* C H A S L G P K L G A G Q V P G L T L G L S V G L W G V A A L L T L P I T L A S G A S G G L C T P V  
*Macaca fascicularis* C H A S L G P K L G A G Q V P G L T L G L S V G L W G V A A L L T L P I T L A S G A S G G L C T P V  
*Macaca nemestrina* C H A S L G P K L G A G Q V P G L T L G L S V G L W G V A A L L T L P I T L A S G A S G G L C T P V

3  
460 470 480 490 500 510 520 530 540 550 560 570 580 590 600  
4

Macaca nigra C H A S L G P K L G A G Q V P G L T L G L S V G L W G V A A L L T L P I T L A S G A S G G L C T P V  
Mandrillus leucophaeus C H A S L G P K L G A G Q V P G L T L G L S V G L W G V A A L L T L P I T L A S G A S G G L C T P V  
Mandrillus apinx C H A S L G P K L G A G Q V P G L T L G L S V G L W G V A A L L T L P I T L A S G A S G G L C T P V  
Cercopithecus agilis C H A S L G P K L G A G Q V P G L T L G L S V G L W G V A A L L T L P I T L A S G A S G G L C T P V  
Theropithecus gelada C H A S L G P K L G A G Q V P G L T L G L S V G L W G V A A L L T L P I T L A S G A S G G L C T P V  
Papio anubis C H A S L G P K L G A G Q V P G L T L G L S V G L W G V A A L L T L P I T L A S G A S G G L C T P V  
Lophocebus albigena C H A S L G P K L G A G Q V P G L T L G L S V G L W G V A A L L T L P I T L A S G A S G G L C T P V  
Lophocebus aterrimus C H A S L G P K L G A G Q V P G L T L G L S V G L W G V A A L L T L P I T L A S G A S G G L C T P V  
Cercopithecus galeritus C H A S L G P K L G A G Q V P G L T L G L S V G L W G V A A L L T L P I T L A S G A S G G L C T P V  
Miopithecus talapoin C H A S L G P K L G A G Q V P G L T L G L S V G L W G V A A L L T L P I T L A S G A S G G L C T P V  
Allenopithecus nigroviridis C H A S L G P K L G A G Q V P G L T L G L S V G L W G V A A L L T L P I T L A S G A S G G L C T P M  
Cercopithecus mitis C H A S L G P K L G A G Q V P G L T L G L S V G L W G V A A L L T L P I T L A S G A S G G L C T P I  
Cercopithecus mona C H A S L G P K L G A G Q V P G L T L G L S V G L W G V A A L L T L P I T L A S G A S G G L C T P I  
Cercopithecus wolffi C H A S L G P K L G A G Q V P G L T L G L S V G L W G V A A L L T L P I T L A S G A S G G L C T P I  
Trachypithecus francoisi C H A S L G P K L G A G Q V P G L T L G L T V G L W G V A A L L T L P I T L A S G A S G G L C T P I  
Colobus guereza C H A S L G P K L G A G Q V P G L T L G L T V G L W G V A A L L T L P I T L A S G A S G G L C T P I  
Rhinopithecus roxellana C H A S L G P K L G A G Q V P G L T L G L T V G L W G V A A L L T L P I T L A S G A S G G L C T P I  
Pan paniscus C H A S L G H R L G A G Q V P G L T L G L T V G I W G V A A L L T L P V T L A S G A S G G L C T L I  
Pan troglodytes C H A S L G H R L G A G Q V P G L T L G L T V G I W G V A A L L T L P V T L A S G A S G G L C T L I  
Homo sapiens C H A S L G H R L G A G Q V P G L T L G L T V G I W G V A A L L T L P V T L A S G A S G G L C T L I  
Gorilla gorilla C H A S L G H R L G A G Q V P G L T L G L T V G I W G V A A L L T L P V T L A S G A S G G L C T L I  
Pongo abelii C H A S L G H K L G A G Q V P G L T L G L T V G I W G V A A L L T L P V T L A S G A S G G L C T L I  
Pongo pygmaeus C H A S L G H K L G A G Q V P G L T L G L T V G I W G V A A L L T L P V T L A S G A S G G L C T L I  
Hylobates agilis C H A S L G H K L G A G Q V P G L T L G L T V G I W G V A A L L T L P V T L A S G A S G G L C T P I  
Hylobates pileatus C H A S L G H K L G A G Q V P G L T L G L T V G I W G V A A L L T L P V T L A S G A S G G L C T R I  
Hylobates lar C H A S L G H K L G A G Q V P G L T L G L T V G I W G V A A L L T L P V T L A S G A S G G L C T L I  
Symphalangus syndactylus C H A S L G H K L G A G Q V P G L T L G L T V G I W G V A A L L T L P V T L A S G A S G G P C T P I  
Nomascus gabrielle C H A S L G H K L G A G Q V P G L T L G L T V G I W G V A A L L T L P V T L A S G A S G G L C T P I  
Nomascus leucogenys C H A S L G H K L G A G Q V P G L T L G L T V G I W G V A A L L T L P V T L A S G A S G G L C T P I  
Chiropotes satanas C H A S L G P K L G A G Q V P G L T L G L T M G L W G A A A L L T L P I T L A S G A S D G L C T P I  
Pithecia pithecia C H A S L G P K L G A G Q V P G L T L G L T V G L W G A A A L L T L P I T L A S G A S D G L C T P I  
Callicebus cupreus C H A S L G P K L S A G Q V P G L T L G L T V G L W G V A A L L T L P I T L A S D A S D G L C T P I  
Alouatta clamitans C H A S L G P K L G A G Q V P G L T L G L T V G L W E A A A L L T L P I T L A S G A S D G L C T P I  
Ateles geoffroyi C H A S L G P K L G A G Q V P G L T L G L T V G L W G A A A L L T L P I T L A S G A S D G L C T P I  
Callithrix sp. C H A S L G P K L G A G Q V P G L T L G L T V G L W G V A A L L T L P I T L A S D A S D G L C T P I  
Callithrix jacchus C H A S L G P K L G A G Q V P G L T L G L T V G L W G V A A L L T L P I T L A S D A S D G L C T P I  
Saguinus imperator C H A S L G P K L G A G Q V P G L T L G L S V G L W G A A A L L T L P I T L A S D A S D G L C T P I  
Saguinus midas C H A S L G P K L G A G Q V P G L T L G L S V G L W G A A A L L T L P I T L A S D A S D G L C T P I



*Nomascus gabrielle* .....C.....C.....A.....CA.....T.....A.....  
Y S T E L K A L Q A T H T V A C L A I F V L L P L G L F G A K G L K K A L G M G P G P W M N I L W A  
*Nomascus leucogenys* .....C.....A.....CA.....T.....A.....  
Y S T E L K A L Q A T H T V A C L A I F V L L P L G L F G A K G L K K A L G M G P G P W M N I L W A  
*Chiropotes satanas* .....CA.....C.....A.....C.....T.....CA.....C.....T.....T.....  
Y S T E L K A L Q A T H T V A C F A I F V L L P L G L F G A K G L K K A L G M G P G P W M N I L W V  
*Pithecia pithecia* .....CA.....C.....A.....C.....T.....CA.....C.....T.....T.....  
Y S T E L K A L Q A T H T V A C F A I F V L L P L G L F G A K G L K K A L G M G P G P W M N I L W V  
*Callicebus cupreus* .....CA.....G.....C.....CT.....T.....CA.....C.....T.....T.....  
Y S T E L K A L Q A T H A V S C F A I F V L L P L G L F G A K G L K K A L G M G P G P W M N I L W V  
*Alouatta clamitans* .....GCA.....A.....T.....T.....CA.....C.....T.....A.....CGG.....T.....GT.....T.....  
Y S A E L K A L Q A T H T V A C F A I F V L L P L G L F G A K G L K K G V G M G P G P W M N I L V V  
*Ateles geoffroyi* .....CA.....C.....A.....C.....T.....C.....C.....T.....T.....  
Y S T E L K A L Q A T H T V A C F A V F V L L P L G L F G A K G L K K A L G M G P G P W M N I L W V  
*Callithrix sp.* .....C.....C.....A.....C.....T.....CA.....C.....T.....A.....C.....G.....T.....  
Y S T E L K A L Q A T H T V A C F A I F V L L P L G L F G A K G L K K A L G M G P G P W M N V L W V  
*Callithrix jacchus* .....C.....A.....C.....T.....CA.....C.....T.....A.....C.....G.....T.....  
Y S T E L K A L Q A T H T V A C F A I F V L L P L G L F G A K G L K K A L G M G P G P W M N V L W V  
*Saguinus imperator* .....T.....C.....C.....A.....C.....T.....CA.....C.....T.....A.....TGC.....T.....  
Y S T E L K A L Q A T H T V A C F A I F V L L P L G L F G A K G L K K V L G M G P G P W M N I L W V  
*Saguinus midas* .....C.....C.....A.....C.....T.....CA.....C.....T.....A.....GC.....T.....  
Y S T E L K A L Q A T H T V A C F A I F V L L P L G L F G A K G L K K A L G M G P G P W M N I L W V  
*Aotinae* .....C.....C.....C.....A.....CA.....T.....CA.....C.....T.....G.....T.....  
H S T E L K A L Q A T H T V T C F A I F V L L P L G L F G A K G L K K A L G M G P G P W M N I L W V  
*Cebus apella* .....T.....C.....C.....A.....C.....T.....CA.....C.....T.....G.....G.....C.....AT.....  
Y S T E L K A L Q A T H T V A C F A I F V L L P L G L F G A K G V K K A L G M G P G P W M T I L W I  
*Saimiri boliviensis* .....C.....G.A.....C.....T.....V.....T.....CA.....C.....T.....G.....C.....T.....  
Y S T E L E A L Q A T H A V A C F A I F V L L P L G L F G A K G L K K A L G M G P G P W M N I L W V  
*Saimiri sciureus* .....C.....T.....A.....C.....T.....CA.....C.....T.....G.....C.....T.....  
Y S T E L K A L Q A T H A V A C F A I F V L L P L G L F G A K G L K K A L G M G P G P W M N I L W V  
*Saimiri ustus* .....C.....T.....A.....C.....T.....CA.....C.....T.....G.....C.....T.....  
Y S T E L K A L Q A T H A V A C F A I F V L L P L G L F G A K G L K K A L G M G P G P W M N I L W V

6  
760

.....|.....|.....|.....  
*Macaca mulatta* TGGTTTATTTCCTGGTGG  
W F I F W W  
*Macaca thibetana* .....  
W F I F W W  
*Cercocebus torquatus* .....  
W F I F W W  
*Macaca fascicularis* .....  
W F I F W W  
*Macaca nemestrina* .....  
W F I F W W  
*Macaca nigra* .....  
W F I F W W  
*Mandrillus leucophaeus* .....  
W F I F W W  
*Mandrillus apinx* .....  
W F I F W W  
*Cercocebus agilis* .....  
W F I F W W  
*Theropithecus gelada* .....  
W F I F W W  
*Papio anubis* .....  
W F I F W W  
*Lophocebus albigena* .....  
W F I F W W  
*Lophocebus aterrimus* .....  
W F I F W W  
*Cercocebus galeritus* .....  
W F I F W W  
*Miopithecus talapoin* .....  
W F I F W W  
*Allenopithecus nigroviridis* .....  
W F I F W W  
*Cercopithecus mitis* .....  
W F I F W W  
*Cercopithecus mona* .....  
W F I F W W  
*Cercopithecus wolfi* .....  
W F I F W W  
*Trachypithecus francoisi* .....  
W F I F W W  
*Colobus guereza* .....  
W F I F W W

|                                 |                      |
|---------------------------------|----------------------|
| <b>Rhinopithecus roxellana</b>  | .....<br>W F I F W W |
| <b>Pan paniscus</b>             | .....<br>W F I F W W |
| <b>Pan troglodytes</b>          | .....<br>W F I F W W |
| <b>Homo sapiens</b>             | .....<br>W F I F W W |
| <b>Gorilla gorilla</b>          | .....<br>W F I F W W |
| <b>Pongo abelii</b>             | .....<br>W F I F W W |
| <b>Pongo pygmaeus</b>           | .....<br>W F I F W W |
| <b>Hylobates agilis</b>         | .....<br>W F I F W W |
| <b>Hylobates pileatus</b>       | .....<br>W F I F W W |
| <b>Hylobates lar</b>            | .....<br>W F I F W W |
| <b>Symphalangus syndactylus</b> | .....<br>W F I F W W |
| <b>Nomascus gabrielle</b>       | .....<br>W F I F W W |
| <b>Nomascus leucogenys</b>      | .....<br>W F I F W W |
| <b>Chiropotes satanas</b>       | .....<br>W F I F W W |
| <b>Pithecia pithecia</b>        | .....G..             |
| <b>Callicebus cupreus</b>       | .....G..             |
| <b>Alouatta clamitans</b>       | .....<br>W F I F W W |
| <b>Ateles geoffroyi</b>         | .....<br>W F I F W W |
| <b>Callithrix sp.</b>           | .....<br>W F I F W W |
| <b>Callithrix jacchus</b>       | .....<br>W F I F W W |
| <b>Saguinus imperator</b>       | .....<br>W F I F W W |
| <b>Saguinus midas</b>           | .....<br>W F I F W W |
| <b>Aotinae</b>                  | .....<br>W F I F W W |
| <b>Cebus apella</b>             | .....<br>W F I F W W |
| <b>Saimiri boliviensis</b>      | .....<br>W F I F W W |
| <b>Saimiri sciureus</b>         | .....<br>W F I F W W |
| <b>Saimiri ustus</b>            | .....<br>W F I F W W |
